# Supplementary material
Source: PubMed Central journal article supplement (PMC3736094)
Supplement: NIHMS52284-supplement-Figure_2S.pdf [file NIHMS52284-supplement-Figure_2S.pdf]

Figure 2S

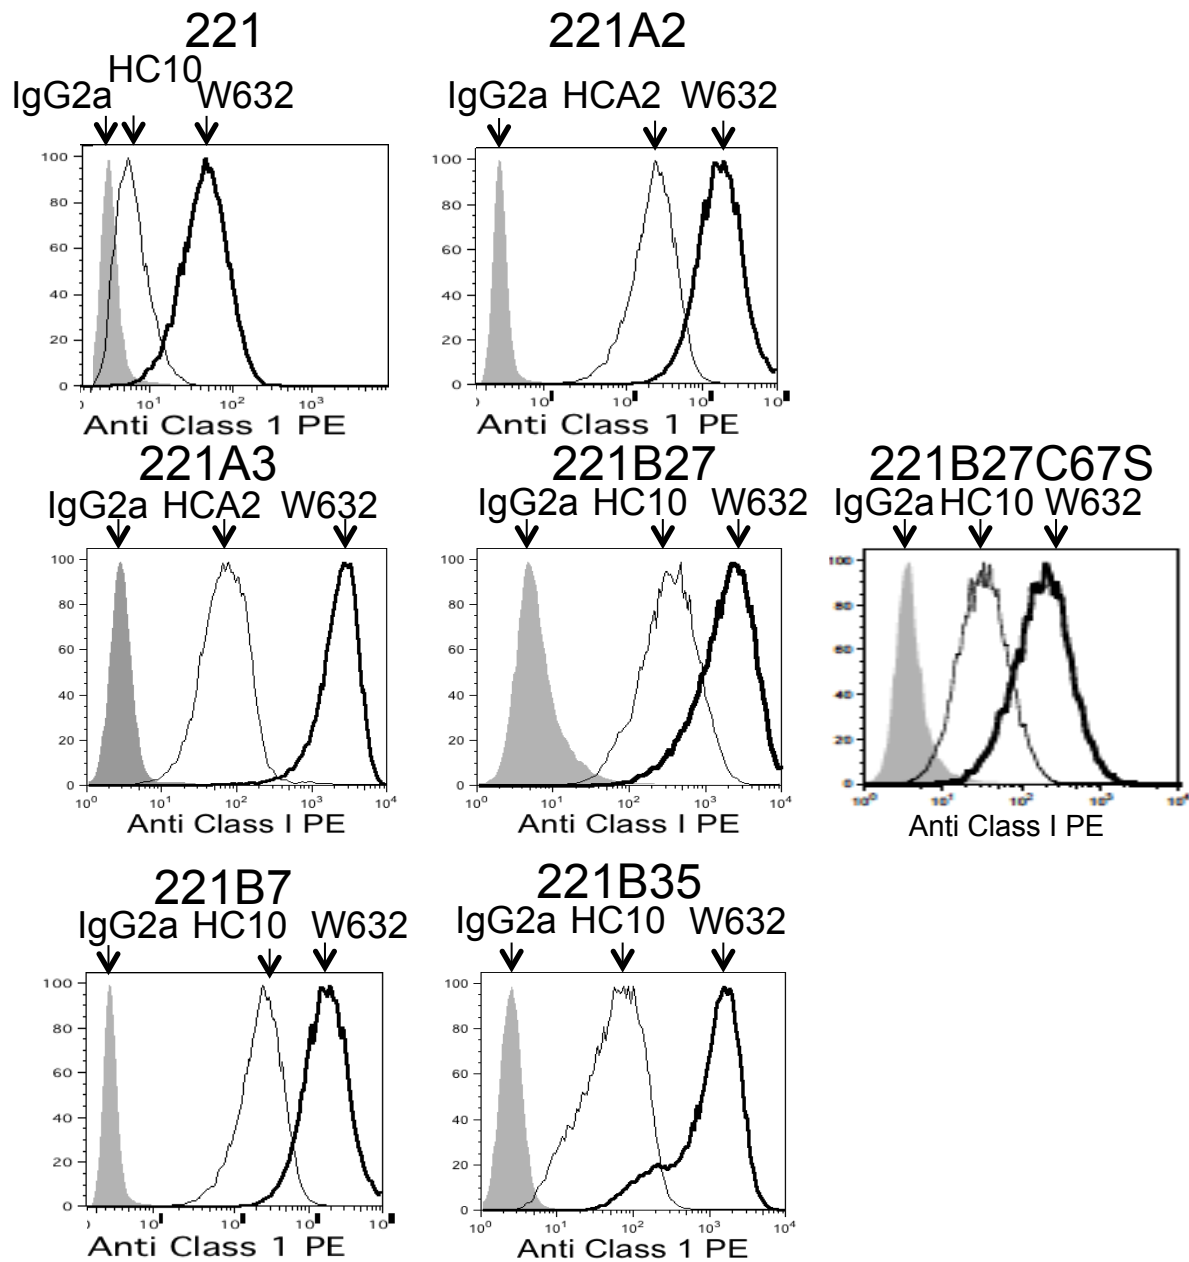

**Figure 2S.** W632 and HC10 FACS staining of parental 221 cells and cells transfected with HLA-A2, A3, HLA-B27, HLA-B7 and HLA-B35. Geometric mean fluorescent intensities were 42.2 and 6.8 for W632 and HC10 staining of 221 cells, 1734 and 334 for HLA-B27, 200 and 32.4 for 221B27C67S, 1677 and 230 for HLA-B7, 932 and 51 for HLA-B35 transfectants and 1554 and 15.5 for 221-A2 (stained with W632 or HCA2) and 2195 and 70 for 221-A3 (stained with W632 or HCA2), respectively. Representative stain from one of five independent experiments. HLA-A2 and A3 heavy chains bind HCA2 Mab but not HC10.
